## ECIL guidelines for treatment of *Pneumocystis jirovecii* pneumonia in non-HIV-infected haematology patients

Georg Maschmeyer<sup>1</sup>, Jannik Helweg-Larsen<sup>2</sup>, Livio Pagano<sup>3</sup>, Christine Robin<sup>4,5</sup>, Catherine Cordonnier<sup>4,5\*</sup> and Peter Schellongowski<sup>6,7</sup> on behalf of the 6th European Conference on Infections in Leukemia (ECIL-6†), a joint venture of The European Group for Blood and Marrow Transplantation (EBMT), The European Organization for Research and Treatment of Cancer (EORTC), the International Immunocompromised Host Society (ICHS) and The European LeukemiaNet (ELN)

<sup>1</sup>Department of Haematology, Oncology and Palliative Care, Klinikum Ernst von Bergmann, Potsdam, Germany; <sup>2</sup>Department of Infectious Diseases, Rigshospitalet, University of Copenhagen, Copenhagen, Denmark; <sup>3</sup>Institute of Haematology, Università Cattolica del Sacro Cuore, Rome, Italy; <sup>4</sup>Department of Haematology, Assistance Publique-hôpitaux de Paris (APHP), Henri Mondor Teaching Hospital, Créteil, France; <sup>5</sup>University Paris-Est Créteil (UPEC), Créteil, France; <sup>6</sup>Department of Medicine I, Intensive Care Unit 13i2, Comprehensive Cancer Centre, Medical University of Vienna, Vienna, Austria; <sup>7</sup>Intensive Care in Hematologic and Oncologic Patients (iCHOP)

\*Corresponding author. Haematology Department, Henri Mondor University Hospital, 51, Avenue du Maréchal de Lattre de Tassigny, 94000 Créteil, France. Tel: +33 1 49 81 20 59; Fax: +33 1 49 81 20 67; E-mail: catherine.cordonnier@aphp.fr

†ECIL-6 participants are listed in the Acknowledgements section.

The initiation of systemic antimicrobial treatment of *Pneumocystis jirovecii* pneumonia (PCP) is triggered by clinical signs and symptoms, typical radiological and occasionally laboratory findings in patients at risk of this infection. Diagnostic proof by bronchoalveolar lavage should not delay the start of treatment. Most patients with haematological malignancies present with a severe PCP; therefore, antimicrobial therapy should be started intravenously. High-dose trimethoprim/sulfamethoxazole is the treatment of choice. In patients with documented intolerance to this regimen, the preferred alternative is the combination of primaquine plus clindamycin. Treatment success should be first evaluated after 1 week, and in case of clinical non-response, pulmonary CT scan and bronchoalveolar lavage should be repeated to look for secondary or co-infections. Treatment duration typically is 3 weeks and secondary anti-PCP prophylaxis is indicated in all patients thereafter. In patients with critical respiratory failure, non-invasive ventilation is not significantly superior to intubation and mechanical ventilation. The administration of glucocorticoids must be decided on a case-by-case basis.

### Introduction

The impact of *Pneumocystis jirovecii* pneumonia (PCP) on morbidity and mortality of immunocompromised patients is substantial. Up to 40% of patients with acute lymphoblastic leukaemia or lymphoproliferative diseases are affected, unless systemic prophylaxis is given.<sup>1</sup> Patients with PCP have an almost 50% incidence of acute lung injury,<sup>2</sup> while survivors have a higher risk of long-term deterioration of lung function (chronic lung injury) than survivors of bacterial pneumonia.<sup>3</sup> In HIV-positive patients, outcome has been improved over the past few decades by early diagnosis, refined intensive care management (low tidal volume, conservative fluid management), identification and effective treatment of co-infections, adjunctive glucocorticosteroids (GCS; in patients with an oxygen partial pressure  $\text{PaO}_2 < 9.3$  kPa), secondary PCP prophylaxis and early combination antiretroviral therapy.<sup>4</sup> We aimed to provide an updated, evidence-based guideline for the treatment and secondary prevention of PCP in patients with haematological diseases. Separate guidelines by

ECIL expert groups focus on epidemiology, risk factors, diagnosis and prevention of PCP.<sup>5–7</sup>

### Methodology

#### Search criteria

A systematic literature review was performed using the PubMed database for publications up to September 2015 for the following MeSH terms: 'pneumocystis OR *Pneumocystis carinii* OR *Pneumocystis jirovecii* AND pneumonia'; 'pneumonia AND neutropenia OR treatment OR haematological malignancies OR stem cell transplantation'. The group co-authoring this manuscript reviewed the 195 publications identified and prepared a slide set comprising evidence-based statements and recommendations presented to the plenary session at the ECIL-6 meeting, 11–12 September 2015, Nice, France. After revision according to the results of the plenary discussion, a summarizing slide set was made available at [www.kobe.fr/ecil](http://www.kobe.fr/ecil) in November 2015. The final manuscript has been written and revised by all co-authors. Recommendations were graded according to the ECIL-6 evidence-based medicine (EBM) grading system, compatible with the EBM grading system of ESCMID.<sup>6,8</sup>

## Symptoms of PCP in haematology patients

Among 55 patients with haematological malignancies who had PCP during the period 1990–99, the characteristic clinical presentation was acute onset with fever (86%), dyspnoea (78%), non-productive cough (71%) and severe hypoxaemia (71%), while thoracic pain (14%) and chills (5%) were less commonly observed.<sup>9</sup> In another retrospective analysis of 56 patients, of whom 44 (78.6%) had haematological malignancies, 18 had undergone HSCT and 12 patients had solid tumours, the main symptoms were fever (85.7%), dyspnoea (78.6%) and cough (57.1%). Their clinical course was rather acute with a median time from symptom onset of 7 (3–14) days. PCP presented as severe pneumonia [ $\text{PaO}_2$ , 58 mmHg/Torr (range 50–70)] with bilateral interstitial infiltrates (80.4%) and bilateral ground-glass attenuation (89.3%) on CT scans. Twenty-four patients (42.9%) required referral to an ICU, 11 (19.6%) underwent mechanical ventilation, and 11 patients died.<sup>10</sup>

Importantly, a wide range of co-infections, particularly pulmonary, are present in 28%–71% of patients, with multiple potentially involved pathogens such as *Staphylococcus aureus*, Gram-negative bacteria, *Aspergillus* species or cytomegalovirus (CMV).

In allogeneic HSCT recipients, PCP is associated with CMV pneumonia in ~50% of cases.<sup>11–14</sup>

## Criteria for initiation of PCP treatment

As delay of treatment increases the need for mechanical ventilation and mortality, prompt initiation of PCP-specific treatment is of critical importance.<sup>15–18</sup> Initiation of treatment should not be deferred by diagnostic procedures, such as bronchoalveolar lavage (BAL), since *P. jirovecii* remains detectable in bronchial secretions for many days after the start of systemic treatment.<sup>19</sup> PCP is highly likely in patients at risk who present with clinical symptoms mentioned above.<sup>20</sup> Prompt diagnostic procedures and antimicrobial treatment against *P. jirovecii* should be triggered by composite criteria (**A-III**) (Figure 1), as single clinical diagnostic criteria are insufficient to prove the diagnosis.

## Grading of PCP severity and prognostic factors

For the decision on the planned duration and the route of administration of systemic antimicrobial treatment, PCP in HIV-positive

patients has been categorized as mild, moderate or severe (Table 1).<sup>21</sup> For moderate and severe PCP, treatment recommendations do not differ substantially. In non-HIV patients, differentiation of PCP severity has not been specifically addressed in prospective clinical studies. However, recommendations regarding first-line antimicrobial treatment refer to a grading of PCP severity also in non-HIV patients, while in clinical practice most non-HIV patients do have severe disease at the time of diagnosis. It appears therefore appropriate to grade the severity of PCP in non-HIV patients into mild versus moderate-to-severe (**B-III**). For assessment of PCP severity, the use of conventional grading systems used for community-acquired pneumonia (such as A-DROP, CURB-65 or Pneumonia Severity Index) has been shown to underestimate the severity of PCP in non-HIV patients;<sup>22</sup> therefore, their use in this setting is not recommended (**D-IIu; formerly B-II against use**). The grading system of Miller<sup>21</sup> appears to provide the most useful criteria for PCP severity assessment in non-HIV patients (**B-III**). Importantly, not only oxygen saturation should be used, but also clinical criteria such as respiratory rate, age, co-morbidities or additional organ dysfunction must be taken into account (**A-IIu, formerly A-II**).

For prediction of poor clinical outcome in non-HIV patients with PCP, both factors present at treatment onset and factors presenting later during antimicrobial therapy have been identified (Table 2).

## First-line treatment

### Selection of drugs

In haematological patients, prospective randomized clinical trials on the optimal selection of antimicrobial agents for the treatment of PCP have not been conducted. Therefore, therapeutic recommendations are based on those in HIV-associated PCP and observational studies on treatment including haematological patients (Table 3). In a comprehensive literature review, we have assessed the outcome of different treatment regimens among non-HIV patients with PCP. Published reports on treatment results in this patient cohort included ~800 patients treated first-line with trimethoprim/sulfamethoxazole<sup>23–27</sup> and <40 patients who received this regimen in combination with other antimicrobials or other drugs including pentamidine, atovaquone or primaquine/clindamycin.<sup>9,13,28–31</sup> For first-line treatment (Table 4),

- Patient at risk  
with
- Clinical signs and symptoms
  - Dyspnoea and/or cough
  - Fever (may rarely be absent)
  - Hypoxaemia (may not yet be present)
  - Chest pain (rare; from pneumothorax)
 with
- Suggestive radiology finding compatible with PCP (preferably thoracic CT scan)  
with or without
- Unexplained serum lactate dehydrogenase (LDH) elevation

**Figure 1.** Indication for starting systemic antimicrobial treatment against *P. jirovecii* in patients with haematological diseases.

**Table 1.** Grading of severity of *Pneumocystis pneumonia*<sup>21</sup>

| Variable                                                         | Severity grading                                                |                                                                                         |                                                                                                                                  |
|------------------------------------------------------------------|-----------------------------------------------------------------|-----------------------------------------------------------------------------------------|----------------------------------------------------------------------------------------------------------------------------------|
|                                                                  | mild                                                            | moderate                                                                                | severe                                                                                                                           |
| Symptoms and signs                                               | increasing exertional dyspnoea with or without cough and sweats | dyspnoea on minimal exertion, occasional dyspnoea at rest, fever with or without sweats | dyspnoea at rest, tachypnoea at rest, persistent fever, cough                                                                    |
| Arterial oxygen tension (PaO <sub>2</sub> ) at rest, room air    | >11.0 kPa (>82.5 mmHg)                                          | 8.1–11.0 kPa (60.75–82.5 mmHg)                                                          | <8.0 kPa (<60 mmHg)                                                                                                              |
| Arterial oxygen saturation (SaO <sub>2</sub> ) at rest, room air | >96%                                                            | 91%–96%                                                                                 | <91%                                                                                                                             |
| Chest radiograph                                                 | normal or minor perihilar shadowing                             | diffuse interstitial shadowing                                                          | extensive interstitial shadowing with or without diffuse alveolar shadowing ('white out') sparing costophrenic angles and apices |

**Table 2.** Poor prognostic factors for outcome in non-HIV patients with PCP<sup>13,20,23,25,28,31,40,56,75</sup>**Poor prognostic factors at onset**

Poor control of underlying disease  
 ECOG PS >2  
 Long-term glucocorticosteroids  
 Delayed onset of PCP treatment  
 Hypoalbuminaemia  
 Co-infection with HSV or CMV  
 High neutrophil count in BAL  
 High APACHE-II or SAPS-II score

**Poor prognostic factors during PCP treatment**

Vasopressor use/shock  
 Need for high-dose glucocorticosteroid treatment  
 Respiratory failure/high oxygen support  
 Need for mechanical ventilation  
 ARDS  
 Clinical worsening at day 8

ARDS, acute respiratory distress syndrome; CMV, cytomegalovirus; ECOG, Eastern Cooperative Oncology Group; HSV, herpes simplex virus; PS, performance score; SAPS, simplified acute physiology score.

trimethoprim/sulfamethoxazole at a dosage of 15–20 mg/kg (trimethoprim) and 75–100 mg/kg (sulfamethoxazole) for  $\geq 14$  days is recommended as primary choice (**A-IIr, formerly A-II**). Co-medication with methotrexate should be avoided because of potentially serious adverse drug effects. For very obese patients, no specific dose limits have been defined. While not routinely available, therapeutic drug monitoring may be recommended in individual patients<sup>32,33</sup> with target peak concentration for sulfamethoxazole of 100–200 mg/L.<sup>34</sup> Alternative treatment regimens for patients with contraindications to trimethoprim/sulfamethoxazole include intravenous pentamidine (4 mg/kg/day),<sup>29</sup> primaquine/clindamycin (30 mg/day + 600 mg every 8 h daily)<sup>30</sup> and atovaquone (750 mg every 8–12 h daily)<sup>30,31</sup> (**C-IIi, formerly C-II**, for each regimen). Prior to the use of primaquine, patients

should be checked for glucose-6-phosphate dehydrogenase deficiency.

**Route of administration**

In patients with mild PCP (which are rarely seen in haematology), an oral strategy is possible from the beginning for compliant patients in whom enteral absorption is not compromised (**B-IIi, formerly B-II**).<sup>35</sup> The dosage of drugs should be identical for oral and intravenous administration (**A-IIi, formerly A-II**). In patients with moderate-to-severe PCP, treatment should be started intravenously (**A-IIu, formerly A-II**). A switch to oral therapy can be considered, once clinical improvement is achieved in compliant patients in whom enteral absorption is not compromised (**A-IIu, formerly A-II**).<sup>36,37</sup>

**Assessment of treatment response**

The efficacy of systemic antimicrobial treatment should be assessed on a daily basis. While early clinical deterioration (within the first 3–5 days after treatment initiation) is common, re-evaluation should not be done before 8 days of full-dose treatment (**A-III**). In a study on non-HIV patients with PCP, radiologic improvement by repeated thoracic CT scan during treatment was seen in 57% of patients at a median of 13 days after initiation of therapy.<sup>38</sup>

In patients without clinical improvement and/or with worsening of respiratory function documented by arterial blood gases after 8 days of adequate anti-PCP treatment, clinical failure should be suspected.  $\beta$ -D-Glucan monitoring is not recommended for response assessment (**D-IIu**), as there are conflicting data for serum  $\beta$ -D-glucan during the course of PCP; elevated levels may indicate treatment failure or another fungal co-infection, whereas decreasing levels are not clearly predictive of treatment success.<sup>29,39</sup>

In patients with clinically documented treatment failure at day 8, a repeat bronchoscopy and BAL to look for co-infections should be ordered (**A-III**). Co-infections are present in 20% of patients at time of admission to an ICU, while another 22% of patients with PCP acquire relevant second infections during ICU treatment.<sup>40</sup>

**Table 3.** Studies on first-line and salvage antimicrobial treatment of PCP

| Population                                                                      | Intention | Intervention                                                            | References       | Comment                                                     |
|---------------------------------------------------------------------------------|-----------|-------------------------------------------------------------------------|------------------|-------------------------------------------------------------|
| First-line treatment<br>HM, SOT, cancer,<br>autoimmune/inflammatory<br>diseases | cure      | TMP/SMX 15–20 mg/kg (TMP)<br>75–100 mg/kg (SMX) per day for<br>≥14 days | 9,24,26–29,31,45 | no randomized trials; high number<br>of cases; low toxicity |
|                                                                                 |           | pentamidine iv 4 mg/kg/day                                              | 29               | retrospective; 5 non-HIV patients                           |
|                                                                                 |           | primaquine + clindamycin<br>30 mg/day + 600 mg×3/day                    | 30               | retrospective; 5 non-HIV patients                           |
|                                                                                 |           | atovaquone 750 mg×2 (or 3)/day                                          | 30,31            | retrospective; 3 non-HIV patients                           |
| Second-line (salvage) treatment<br>HM, SOT, cancer, autoimmune<br>diseases      | cure      | primaquine (30 mg) + clindamycin<br>(600 mg×3) per day                  | 23,44,45         | few cases                                                   |
|                                                                                 |           | pentamidine iv 4 mg/kg/day                                              | 9,28,44,45       | few cases                                                   |
|                                                                                 |           | TMP/SMX (15–20 mg/kg) + caspofungin<br>(70–50 mg/day)                   | 47–49            | few cases, no haematological patients                       |
|                                                                                 |           | echinocandin alone                                                      | 76,77            | only case reports                                           |

HM, haematological malignancies; iv, intravenously; SOT, solid organ transplant; TMP/SMX, trimethoprim/sulfamethoxazole.

**Table 4.** Recommended first-line treatment in non-HIV patients with PCP

| Population                                            | Intention | Intervention                                                      | SoR      | QoE        |
|-------------------------------------------------------|-----------|-------------------------------------------------------------------|----------|------------|
| HM, SOT, cancer, autoimmune/<br>inflammatory diseases | to cure   | TMP/SMX 15–20 mg/kg (TMP) 75–100 mg/kg (SMX) per day for ≥14 days | <b>A</b> | <b>IIr</b> |
|                                                       |           | pentamidine iv 4 mg/kg/day                                        | <b>C</b> | <b>IIt</b> |
|                                                       |           | primaquine + clindamycin 30 mg/day oral + 600 mg×3/day iv or oral | <b>C</b> | <b>IIt</b> |
|                                                       |           | atovaquone 750 mg×2(or 3)/day oral                                | <b>C</b> | <b>IIt</b> |

HM, haematological malignancies; iv, intravenously; QoE, quality of evidence; SoR, strength of recommendation; SOT, solid organ transplant; TMP/SMX, trimethoprim/sulfamethoxazole.

For evaluation of BAL findings, the persistence of a positive *P. jirovecii* PCR should not be interpreted as treatment failure (**D-IIIt, formerly A-II against use**), as *P. jirovecii* will remain detectable for days or even weeks under systemic anti-PCP treatment.<sup>19</sup> With respect to BAL *P. jirovecii* load using quantitative PCR, there are currently no data on the kinetics under treatment. For β-D-glucan in follow-up BAL, no data from clinical studies have been reported so far.

In addition, a new thoracic CT scan should be ordered to monitor the course of PCP-related lung infiltrates and to check for PCP complications such as spontaneous pneumothorax or pleural effusion (**A-III**).<sup>13</sup>

An unnecessary switch to second-line PCP treatment in patients receiving high-dose trimethoprim/sulfamethoxazole should be avoided (**A-IIIt, formerly A-II**), as the efficacy of second-line treatment is less well documented than that of front-line trimethoprim/sulfamethoxazole. A switch to second-line treatment should therefore only be considered after exclusion of a co-infection or another cause of (clinical and/or radiologic) deterioration.

Dihydropteroate synthase gene mutations, while associated with failure of sulfa-based PCP prophylaxis,<sup>41</sup> are not associated

with failure of high-dose trimethoprim/sulfamethoxazole treatment in HIV-positive or -negative patients.<sup>42,43</sup>

### Salvage treatment (second-line treatment)

In patients with intolerance to or treatment failure under high-dose trimethoprim/sulfamethoxazole treatment, second-line (or ‘salvage’) therapy is required (Table 5). While clinical trials on this indication in non-HIV patients have not been reported, reports from the literature<sup>23,44,45</sup> suggest that first choice of drugs in this setting is the combination of primaquine and clindamycin (**B-IIIt, formerly B-II**). In the setting of HIV-positive patients with PCP, Helweg-Larsen *et al.*<sup>46</sup> reported the results of a large observational study, in which second-line treatment with primaquine/clindamycin was superior to pentamidine, translating into reduced mortality. Prior to the use of primaquine, patients should be checked for glucose-6-phosphate dehydrogenase deficiency. Alternatives are intravenous pentamidine (4 mg/kg/day) (**B-III**)<sup>9,28,44,45</sup> or the combination of high-dose trimethoprim/sulfamethoxazole with caspofungin (70–50 mg per day) (**C-IIu, formerly C-II**); however, the possible efficacy of this combination

**Table 5.** Options for second-line treatment in non-HIV patients with PCP

| Population                           | Intention | Intervention                                           | SoR      | QoE                   |
|--------------------------------------|-----------|--------------------------------------------------------|----------|-----------------------|
| HM, SOT, cancer, autoimmune diseases | cure      | primaquine (30 mg) + clindamycin (600 mg×3) per day    | <b>B</b> | <b>II<sup>t</sup></b> |
|                                      |           | pentamidine iv 4 mg/kg/day                             | <b>B</b> | <b>III</b>            |
|                                      |           | TMP/SMX (15–20 mg/kg/day) + caspofungin (70–50 mg/day) | <b>C</b> | <b>II<sup>u</sup></b> |
|                                      |           | echinocandin alone                                     | <b>D</b> | <b>II<sup>u</sup></b> |

HM, haematological malignancies; QoE, quality of evidence; SoR, strength of recommendation; SOT, solid organ transplant; TMP/SMX, trimethoprim/sulfamethoxazole.

**Table 6.** PCP treatment: main drug-related adverse events

| TMP/SMX                                                                                                                                                                                   | Clindamycin/primaquine                                                                                                                                                                                                                          | Pentamidine iv                                                                                                                                                                                                                                          |
|-------------------------------------------------------------------------------------------------------------------------------------------------------------------------------------------|-------------------------------------------------------------------------------------------------------------------------------------------------------------------------------------------------------------------------------------------------|---------------------------------------------------------------------------------------------------------------------------------------------------------------------------------------------------------------------------------------------------------|
| <ul style="list-style-type: none"> <li>• rash and fever</li> <li>• nephrotoxicity</li> <li>• electrolyte disorders</li> <li>• bone marrow depression</li> <li>• hepatotoxicity</li> </ul> | <ul style="list-style-type: none"> <li>• nausea and vomiting</li> <li>• neutropenia</li> <li>• <i>Clostridium difficile</i>-associated diarrhoea</li> <li>• haemolysis in patients with glucose-6-phosphate dehydrogenase deficiency</li> </ul> | <ul style="list-style-type: none"> <li>• bone marrow suppression</li> <li>• nephrotoxicity</li> <li>• electrolyte disorders</li> <li>• dysglycaemia, insulin-dependent diabetes mellitus</li> <li>• pancreatitis</li> <li>• Q-T prolongation</li> </ul> |

TMP/SMX, trimethoprim/sulfamethoxazole.

has only been reported in individual patients.<sup>47–49</sup> An echinocandin alone should not be considered (**D-II<sup>u</sup>**, formerly **A-II against use**), because a sufficient anti-PCP efficacy has not been demonstrated,<sup>45,50</sup> and reports of breakthrough PCP in patients being treated with an echinocandin for other purposes have been published.<sup>51</sup>

## Drug-related side effects and drug–drug interactions

Most of the drugs recommended for PCP treatment are associated with a substantial rate of drug-related adverse events (AEs). While a detailed discussion of these potential AE exceeds the scope of this guideline, an overview of the main side effects is given in Table 6.

Clinically important drug–drug interactions may be relevant in patients being treated for PCP. Atovaquone interacts with rifampicin and rifabutin, clindamycin with macrolide antibiotics, dapsone with rifampicin, trimethoprim and probenecid, pentamidine with foscarnet, and trimethoprim/sulfamethoxazole with dapsone and rifampicin. It is of utmost importance to check all co-medications for drug–drug interactions in patients treated for PCP.

## Treatment duration

Standard duration of drug treatment in PCP is 3 weeks (**B-II<sup>t</sup>**). In mild cases, it should be at least 2 weeks (**A-II<sup>t</sup>**, formerly **A-II**). In case of slow clinical improvement, the unmodified treatment

should be continued for at least 3 weeks (**A-II<sup>u</sup>**, formerly **A-II**).<sup>13,30</sup>

## ICU management

Short- and long-term survival rates of ICU patients with haematological malignancies have improved markedly in recent years,<sup>52,53</sup> and haematological outcomes may not be affected by temporary organ dysfunction(s).<sup>52,54,55</sup> Therefore, evidence-based expert consensus recommends full ICU support for a growing number of patients.<sup>53</sup>

Almost every second patient with haematological malignancy and PCP develops acute respiratory failure (ARF) requiring ICU admission.<sup>9,10,56</sup> While mortality rates of non-HIV patients with PCP-associated ARF are generally higher than in HIV-positive patients,<sup>57–59</sup> the prognosis of haematological patients with PCP-associated ARF may not be different from ARF due to other aetiologies.<sup>60</sup> In patients with haematological malignancies, any signs or symptoms of respiratory deterioration (dyspnoea, cough, sputum, chest pain, rales, haemoptysis, increasing pulmonary infiltrates, demand for O<sub>2</sub> >1 L/min) are associated with the development of ARF, ICU admission and adverse outcome.<sup>61,62</sup> Timely recognition of such situations in patients with PCP is crucial, since late ICU transfers are associated with increased mortality rates (**A-II<sup>h</sup>**, formerly **A-II**).<sup>63,64</sup>

Historical data suggested that non-invasive ventilation (NIV) was associated with reduced intubation rates and improved mortality in immunosuppressed patients with hypoxic ARF, when compared with standard oxygen.<sup>65</sup> In accordance, a current meta-analysis of earlier, mainly observational data showed a survival benefit with NIV used as an initial ventilatory strategy when compared with invasive mechanical ventilation in patients with haematological malignancies.<sup>66</sup> However, a recently published large propensity score matched analysis in haematological patients<sup>67</sup> and a large interventional trial in immunosuppressed (mainly haematological) patients with hypoxic ARF did not show any harm or benefit of early NIV when compared with standard oxygen.<sup>68</sup> The discussion of these study results prompted a revision of the provisional preference (**B-I**) of the group for NIV, as stated in the original ECIL-6 slide set. While survival rates of primarily intubated haematological patients with ARF have improved steadily over the last two decades,<sup>60</sup> NIV failure with secondary intubation may be associated with excess mortality in (at least subgroups of) haematological patients.<sup>66,69–71</sup> In general, NIV failure rates in haematological patients with severe hypoxic ARF (acute respiratory distress syndrome)<sup>60</sup> and specifically in those with PCP are particularly high (~70%).<sup>58</sup> If clinicians decide to



**Table 7.** Adjunctive GCS in non-HIV patients with PCP

| First author (year)                         | Number (haematological malignancy) | Years     | n (%); mortality (%) |             | Mortality, total (%) |
|---------------------------------------------|------------------------------------|-----------|----------------------|-------------|----------------------|
|                                             |                                    |           | with GCS             | without GCS |                      |
| Bollée <sup>a</sup> (2007) <sup>10</sup>    | 56 (44)                            | 2001–06   | 21 (38); 10          | 35 (62); 26 | 20                   |
| Burke (1973) <sup>78</sup>                  | 46 (20)                            | 1959–71   | —                    | —           | 80                   |
| Delclaux (1999) <sup>79</sup>               | 31 (24)                            | 1988–96   | 23 (74); 39          | 8 (26); 50  | 42                   |
| Overgaard <sup>b</sup> (2007) <sup>80</sup> | 44 (33)                            | 2002–04   | 33 (77); 12          | 11 (23); 20 | 14 (PCP)             |
| Kofteridis (2014) <sup>26</sup>             | 62 (31)                            | 2004–13   | 50 (81); 30          | 12 (19); 25 | 29 (PCP)             |
| Lemiale <sup>a</sup> (2013) <sup>40</sup>   | 139 (55)                           | 1988–2011 | 107 (77); 26         | 32 (23); 25 | 26 (ICU)             |
| Moon (2011) <sup>27</sup>                   | 88 (26)                            | 2007–10   | 59 (67); 31          | 29 (33); 34 | 32 (3 months)        |
| Pagano (2002) <sup>9</sup>                  | 55 (55)                            | 1990–99   | 22 (37); 36          | 33 (63); 36 | 29 (PCP)             |
| Pareja <sup>a</sup> (1998) <sup>81</sup>    | 30 (8)                             | 1989–95   | 16 (53); 44          | 14 (47); 36 | 40                   |
| Roblot (2002) <sup>31</sup>                 | 103 (60)                           | 1995–99   | 58 (56); ND          | 42 (51); ND | 38 (1 month)         |
| Zahar <sup>a</sup> (2002) <sup>82</sup>     | 39 (28)                            | 1989–99   | 33 (79); 68          | 6 (15); 20  | 33 (3 months)        |

GCS, glucocorticosteroids; ND, no difference.

<sup>a</sup>Substantial overlap of patients.

<sup>b</sup>Data reanalysed in 2015 by J. H.-L.

use NIV as primary ventilation strategy, the development of incipient NIV failure must be monitored closely: poor tolerance of NIV, no clinical improvement within 6 h, no improvement of arterial blood gases within 6 h, respiratory rate remaining >30/min, NIV dependency >3 days, clinical or respiratory deterioration, unknown aetiology of ARF (**A-IIh, formerly A-II**).<sup>72</sup> If NIV failure becomes imminent, patients must be evaluated for prompt intubation and invasive mechanical ventilation (**A-III**).

## Glucocorticosteroids as adjunctive therapy in non-HIV patients with PCP

In HIV-positive patients with moderate-to-severe PCP, evidence derived from a meta-analysis on six randomized controlled trials suggests a survival benefit of adjunctive GCS therapy.<sup>73</sup> Accordingly, in these patients, adjunctive GCS are strongly recommended by current guidelines.<sup>74</sup> However, there are no interventional trials in non-HIV patients with PCP and the results of several retrospective observations are conflicting. All reports have typical limitations of retrospective observational analyses with a substantial risk of confounding by indication: most report on small patient numbers, different doses and (often non-reported) timing of GCS treatment, different definitions regarding PCP severity, as well as considerably heterogeneous cohorts with respect to underlying diseases and proportions of haematological malignancies. No detailed data on patients with leukaemia (or subgroup analyses) are available. Furthermore, there may be considerable patient overlap between some studies (Table 7). The most recent investigation with the largest number of patients performed a pooled analysis of 139 non-HIV ICU patients with severe PCP by first employing multi-variable statistics. High-dose GCS treatment (>1 mg/kg body-weight per day) was an independent predictor of ICU mortality but not associated with the rate of ICU-acquired infections.<sup>40</sup>

The routine adjunctive use of GCS in non-HIV patients with PCP and respiratory failure is not recommended. The decision to add GCS in a non-HIV patient with PCP and respiratory failure has to be made on an individual basis (**B-IIh, formerly B-II**). A significant

proportion of non-HIV patients with PCP have been treated with GCS prior to PCP onset. It remains unclear how to treat these patients (maintaining the dose versus escalation versus tapering). Investigational trials on the use of GCS accounting for previous GCS treatment and PCP severity are needed in haematology patients with PCP.

## Secondary anti-PCP prophylaxis

All non-HIV patients who have been successfully treated for PCP, should be given secondary anti-PCP prophylaxis (**A-IIh, formerly A-II**). Preferred and alternative regimens for secondary PCP prophylaxis should be chosen as for primary prophylaxis.<sup>7</sup> Co-medication with methotrexate may cause substantial toxicity.

A stopping rule for secondary PCP prophylaxis in patients whose immune system is recovering has not yet been defined; therefore, the decision to discontinue secondary PCP prophylaxis has to be made on an individual basis.

## Conclusions

Early treatment of PCP through intravenous antimicrobial therapy is of high importance in patients with haematological malignancies, and high-dose trimethoprim/sulfamethoxazole is currently the treatment of choice. Recent recommendations from ECIL-6 provide updated, evidence-based guidelines for the treatment of PCP in this patient population, including guidance on first-line and salvage treatment, therapy duration, assessment of the treatment response and ICU management in non-HIV patients with PCP.

High-dose trimethoprim/sulfamethoxazole for over 2 weeks remains the recommended treatment in non-HIV patients with PCP (**A-II**), with primaquine plus clindamycin the preferred second-line therapy (**B-II**). The routine adjunctive use of GCS in non-HIV patients with PCP and respiratory failure is not recommended but may be used on an individual patient basis (**B-IIh**).

These recommendations should assist healthcare professionals in making timely and effective decisions in regards to treatment of PCP in this patient population.

## Acknowledgements

We thank Jordi Carratalà (Barcelona) and J. Peter Donnelly (Nijmegen) for their helpful support of the plenary debate of this guideline at ECIL-6.

## ECIL-6 meeting participants

Murat Akova, Turkey; Mahmoud Aljurf, Saudi Arabia; Dina Averbuch, Israel; Rosemary Barnes, UK; Ola Blennow, Sweden; Pierre-Yves Bochud, Switzerland; Emilio Bouza, Spain; Stéphane Bretagne, France; Roger Brüggemann, The Netherlands; Thierry Calandra, Switzerland; Jordi Carratalà, Spain; Simone Cesaro, Italy; Catherine Cordonnier, France; Oliver Cornely, Germany; Tina Dalianis, Sweden; Rafael de la Camara, Spain; Peter Donnelly, The Netherlands; Lubos Drgona, Slovakia; Rafael Duarte, Spain; Hermann Einsele, Germany; Dan Engelhard, Israel; Christopher Fox, UK; Corrado Girmenia, Italy; Andreas Groll, Germany; Dag Heldal, Norway; Jannick Helweg-Larsen, Denmark; Raoul Herbrecht, France; Hans Hirsch, Switzerland; Elisabeth Johnson, UK; Galina Klyasova, Russia; Minna Koskenvuo, Finland; Katrien Lagrou, Belgium; Russell E. Lewis, Italy; Per Ljungman, Sweden; Johan Maertens, Belgium; Georg Maschmeyer, Germany; Malgorzata Mikulska, Italy; Marcio Nucci, Brazil; Christophe Padoin, France; Livio Pagano, Italy; Antonio Pagliuca, UK; Zdenek Racil, Czech Republic; Patricia Ribaud, France; Christine Rinaldo, Norway; Valérie Rizzi-Puechal (Pfizer), France; Emmanuel Roilides, Greece; Christine Robin, France; Montserrat Rovira, Spain; Markus Rupp (Merck), Germany; Sonia Sanchez (Gilead Sciences), UK; Peter Schellongowski, Austria; Peter Sedlacek, Czech Republic; Janos Sinko, Hungary; Monica Slavin, Australia; Isabella Sousa Ferreira, Portugal; Jan Styczynski, Poland; Frederic Tissot, Switzerland; Claudio Viscoli, Italy; Katherine Ward, UK; Anne-Therese Witschi (Basilea), Switzerland.

## Funding

The ECIL-6 meeting was supported by unrestricted educational grants from Basilea, Gilead Sciences, Merck, and Pfizer.

## Transparency declarations

All authors: none to declare.

## Author contributions

All authors developed the content of the manuscript. G. M. drafted the manuscript, and all authors approved the final version.

## References

- Hughes WT, Feldman S, Aur RJ *et al.* Intensity of immunosuppressive therapy and the incidence of *Pneumocystis carinii* pneumonitis. *Cancer* 1975; **36**: 2004–9.
- Kojic M, Li G, Hanson AC, Lee KM *et al.* Risk factors for the development of acute lung injury in patients with infectious pneumonia. *Crit Care* 2012; **16**: R46.
- Morris AM, Huang L, Bacchetti P *et al.* Permanent declines in pulmonary function following pneumonia in human immunodeficiency virus-infected persons. The Pulmonary Complications of HIV Infection Study Group. *Am J Respir Crit Care Med* 2000; **162**: 612–6.
- Zolopa A, Andersen J, Powderly W *et al.* Early antiretroviral therapy reduces AIDS progression/death in individuals with acute opportunistic infections: a multicenter randomized strategy trial. *PLoS One* 2009; **4**: e575.
- Alanio A, Hauser PM, Lagrou K *et al.* ECIL guidelines for the diagnosis of *Pneumocystis jirovecii* pneumonia in patients with haematological malignancies and stem cell transplant recipients. *J Antimicrob Chemother* 2016; **71**: 2386–96.
- Cordonnier C, Cesaro S, Maschmeyer G *et al.* *Pneumocystis jirovecii* pneumonia: still a concern in patients with haematological malignancies and stem cell transplant recipients. *J Antimicrob Chemother* 2016; **71**: 2379–85.
- Maertens J, Cesaro S, Maschmeyer G *et al.* ECIL guidelines for preventing *Pneumocystis jirovecii* pneumonia in patients with haematological malignancies and stem cell transplant recipients. *J Antimicrob Chemother* 2016; **71**: 2397–404.
- Ullmann AJ, Akova M, Herbrecht R *et al.* ESCMID guideline for the diagnosis and management of *Candida* diseases 2012: adults with haematological malignancies and after haematopoietic stem cell transplantation (HCT). *Clin Microbiol Infect* 2012; **18** Suppl 7: 53–67.
- Pagano L, Fianchi L, Mele L *et al.* *Pneumocystis carinii* pneumonia in patients with malignant haematological diseases: 10 years' experience of infection in GIMEMA centres. *Br J Haematol* 2002; **117**: 379–86.
- Bollée G, Sarfati C, Thiéry G *et al.* Clinical picture of *Pneumocystis jirovecii* pneumonia in cancer patients. *Chest* 2007; **132**: 1305–10.
- Ewig S, Bauer T, Schneider C *et al.* Clinical characteristics and outcome of *Pneumocystis carinii* pneumonia in HIV-infected and otherwise immunosuppressed patients. *Eur Respir J* 1995; **8**: 1548–53.
- Toper C, Rivaud E, Daniel C *et al.* [*Pneumocystis jirovecii* pneumonia in non-HIV infected patients: a study of 41 cases]. *Rev Pneumol Clin* 2011; **67**: 191–8.
- Torres HA, Chemaly RF, Storey R *et al.* Influence of type of cancer and hematopoietic stem cell transplantation on clinical presentation of *Pneumocystis jirovecii* pneumonia in cancer patients. *Eur J Clin Microbiol Infect Dis* 2006; **25**: 382–8.
- Yale SH, Limper AH. *Pneumocystis carinii* pneumonia in patients without acquired immunodeficiency syndrome: associated illness and prior corticosteroid therapy. *Mayo Clin Proc* 1996; **71**: 5–13.
- Asai N, Motojima S, Ohkuni Y *et al.* Early diagnosis and treatment are crucial for the survival of *Pneumocystis* pneumonia patients without human immunodeficiency virus infection. *J Infect Chemother* 2012; **18**: 898–905.
- Guo F, Chen Y, Yang SL *et al.* *Pneumocystis* pneumonia in HIV-infected and immunocompromised non-HIV infected patients: a retrospective study of two centers in China. *PLoS One* 2014; **9**: e101943.
- Li MC, Lee NY, Lee CC *et al.* *Pneumocystis jirovecii* pneumonia in immunocompromised patients: delayed diagnosis and poor outcomes in non-HIV-infected individuals. *J Microbiol Immunol Infect* 2014; **47**: 42–7.
- Roux A, Canet E, Valade S *et al.* *Pneumocystis jirovecii* pneumonia in patients with or without AIDS, France. *Emerg Infect Dis* 2014; **20**: 1490–7.
- Roger PM, Vandenbos F, Pugliese P *et al.* Persistence of *Pneumocystis carinii* after effective treatment of *P. carinii* pneumonia is not related to relapse or survival among patients infected with human immunodeficiency virus. *Clin Infect Dis* 1998; **26**: 509–10.
- Roux A, Gonzalez F, Roux M *et al.* Update on pulmonary *Pneumocystis jirovecii* infection in non-HIV patients. *Med Mal Infect* 2014; **44**: 185–98.
- Miller RF, Le Noury J, Corbett EL *et al.* *Pneumocystis carinii* infection: current treatment and prevention. *J Antimicrob Chemother* 1996; **37** Suppl B: 33–53.
- Asai N, Motojima S, Ohkuni Y *et al.* Non-HIV *Pneumocystis* pneumonia: do conventional community-acquired pneumonia guidelines underestimate its severity? *Multidiscip Respir Med* 2012; **7**: 2.
- Boonsarngsuk V, Sirilak S, Kiatboonsri S. Acute respiratory failure due to *Pneumocystis* pneumonia: outcome and prognostic factors. *Int J Infect Dis* 2009; **13**: 59–66.

- 24 Cerón I, Rabagliati R, Langhaus J et al. [*Pneumocystis jirovecii* pneumonia: comparative study of cases in HIV-infected patients and immunocompromised non-HIV-infected patients]. *Rev Chilena Infectol* 2014; **31**: 417–24.
- 25 Kim SJ, Lee J, Cho YJ et al. Prognostic factors of *Pneumocystis jirovecii* pneumonia in patients without HIV infection. *J Infect* 2014; **69**: 88–95.
- 26 Kofteridis DP, Valachis A, Velegraki M et al. Predisposing factors, clinical characteristics and outcome of *Pneumocystis jirovecii* pneumonia in HIV-negative patients. *J Infect Chemother* 2014; **20**: 412–6.
- 27 Moon SM, Kim T, Sung H et al. Outcomes of moderate-to-severe *Pneumocystis* pneumonia treated with adjunctive steroid in non-HIV-infected patients. *Antimicrob Agents Chemother* 2011; **55**: 4613–8.
- 28 Ko Y, Jeong BH, Park HY et al. Outcomes of *Pneumocystis* pneumonia with respiratory failure in HIV-negative patients. *J Crit Care* 2014; **29**: 356–61.
- 29 Matsumura Y, Shindo Y, Iinuma Y et al. Clinical characteristics of *Pneumocystis* pneumonia in non-HIV patients and prognostic factors including microbiological genotypes. *BMC Infect Dis* 2011; **11**: 76.
- 30 McKinnell JA, Cannella AP, Kunz DF et al. *Pneumocystis* pneumonia in hospitalized patients: a detailed examination of symptoms, management, and outcomes in human immunodeficiency virus (HIV)-infected and HIV-uninfected persons. *Transpl Infect Dis* 2012; **14**: 510–8.
- 31 Roblot F, Godet C, Le Moal G et al. Analysis of underlying diseases and prognosis factors associated with *Pneumocystis carinii* pneumonia in immunocompromised HIV-negative patients. *Eur J Clin Microbiol Infect Dis* 2002; **21**: 523–31.
- 32 Brown GR. Cotrimoxazole—optimal dosing in the critically ill. *Ann Intensive Care* 2014; **4**: 13.
- 33 Dao BD, Barreto JN, Wolf RC et al. Serum peak sulfamethoxazole concentrations demonstrate difficulty in achieving a target range: a retrospective cohort study. *Curr Ther Res Clin Exp* 2014; **76**: 104–9.
- 34 Chin TW, Vandenbroucke A, Fong IW. Pharmacokinetics of trimethoprim-sulfamethoxazole in critically ill and non-critically ill AIDS patients. *Antimicrob Agents Chemother* 1995; **39**: 28–33.
- 35 Safrin S, Finkelstein DM, Feinberg J et al. Comparison of three regimens for treatment of mild to moderate *Pneumocystis carinii* pneumonia in patients with AIDS. A double-blind, randomized, trial of oral trimethoprim-sulfamethoxazole, dapsone-trimethoprim, and clindamycin-primaquine. ACTG 108 Study Group. *Ann Intern Med* 1996; **124**: 792–802.
- 36 Carmona EM, Limper AH. Update on the diagnosis and treatment of *Pneumocystis* pneumonia. *Ther Adv Respir Dis* 2011; **5**: 41–59.
- 37 Cooley L, Dendle C, Wolf J et al. Consensus guidelines for diagnosis, prophylaxis and management of *Pneumocystis jirovecii* pneumonia in patients with haematological and solid malignancies, 2014. *Intern Med J* 2014; **44**: 1350–63.
- 38 Vogel MN, Vatlach M, Weissgerber P et al. HRCT-features of *Pneumocystis jirovecii* pneumonia and their evolution before and after treatment in non-HIV immunocompromised patients. *Eur J Radiol* 2012; **81**: 1315–20.
- 39 Held J, Wagner D.  $\beta$ -D-Glucan kinetics for the assessment of treatment response in *Pneumocystis jirovecii* pneumonia. *Clin Microbiol Infect* 2011; **17**: 1118–22.
- 40 Lemiale V, Debrumetz A, Delannoy A et al. Adjunctive steroid in HIV-negative patients with severe *Pneumocystis* pneumonia. *Respir Res* 2013; **14**: 87.
- 41 Nahimana A, Rabodonirina M, Zanetti G et al. Association between a specific *Pneumocystis jirovecii* dihydropteroate synthase mutation and failure of pyrimethamine/sulfadoxine prophylaxis in human immunodeficiency virus-positive and -negative patients. *J Infect Dis* 2003; **188**: 1017–23.
- 42 Navin TR, Beard CB, Huang L et al. Effect of mutations in *Pneumocystis carinii* dihydropteroate synthase gene on outcome of *P. carinii* pneumonia in patients with HIV-1: a prospective study. *Lancet* 2001; **358**: 545–9.
- 43 Yoon C, Subramanian A, Chi A et al. Dihydropteroate synthase mutations in *Pneumocystis* pneumonia: impact of applying different definitions of prophylaxis, mortality endpoints and mutant in a single cohort. *Med Mycol* 2013; **51**: 568–75.
- 44 Kim T, Kim SH, Park KH et al. Clindamycin-primaquine versus pentamidine for the second-line treatment of *pneumocystis* pneumonia. *J Infect Chemother* 2009; **15**: 343–6.
- 45 Kim T, Hong HL, Lee YM et al. Is caspofungin really an effective treatment for *Pneumocystis jirovecii* pneumonia in immunocompromised patients without human immunodeficiency virus infection? Experiences at a single center and a literature review. *Scand J Infect Dis* 2013; **45**: 484–8.
- 46 Helweg-Larsen J, Benfield T, Atzori C et al. Clinical efficacy of first- and second-line treatments for HIV-associated *Pneumocystis jirovecii* pneumonia: a tri-centre cohort study. *J Antimicrob Chemother* 2009; **64**: 1282–90.
- 47 Armstrong-James D, Stebbing J, John L et al. A trial of caspofungin salvage treatment in PCP pneumonia. *Thorax* 2011; **66**: 537–8.
- 48 Tu GW, Ju MJ, Xu M et al. Combination of caspofungin and low-dose trimethoprim/sulfamethoxazole for the treatment of severe *Pneumocystis jirovecii* pneumonia in renal transplant recipients. *Nephrology (Carlton)* 2013; **18**: 736–42.
- 49 Utili R, Durante-Mangoni E, Basilio C et al. Efficacy of caspofungin addition to trimethoprim-sulfamethoxazole treatment for severe *Pneumocystis* pneumonia in solid organ transplant recipients. *Transplantation* 2007; **84**: 685–8.
- 50 Lobo ML, Esteves F, de Sousa B et al. Therapeutic potential of caspofungin combined with trimethoprim-sulfamethoxazole for *pneumocystis* pneumonia: a pilot study in mice. *PLoS One* 2013; **8**: e70619.
- 51 Kamboj M, Weinstock D, Sepkowitz KA. Progression of *Pneumocystis jirovecii* pneumonia in patients receiving echinocandin therapy. *Clin Infect Dis* 2006; **43**: e92–4.
- 52 Azoulay E, Mokart D, Pène F et al. Outcomes of critically ill patients with hematologic malignancies: prospective multicenter data from France and Belgium—a groupe de recherche respiratoire en réanimation oncopathologique study. *J Clin Oncol* 2013; **31**: 2810–8.
- 53 Azoulay E, Pène F, Darmon M et al. Managing critically ill hematology patients: Time to think differently. *Blood Rev* 2015; **29**: 359–67.
- 54 Schellongowski P, Staudinger T, Kundi M et al. Prognostic factors for intensive care unit admission, intensive care outcome, and post-intensive care survival in patients with *de novo* acute myeloid leukemia: a single center experience. *Haematologica* 2011; **96**: 231–7.
- 55 Wohlfarth P, Carlström A, Staudinger T et al. Incidence of intensive care unit admission, outcome, and post intensive care survival in patients with diffuse large B-cell lymphoma. *Leuk Lymphoma* 2016 Jan 13 [Epub ahead of print].
- 56 Roblot F, Le Moal G, Godet C et al. *Pneumocystis carinii* pneumonia in patients with hematologic malignancies: a descriptive study. *J Infect* 2003; **47**: 19–27.
- 57 Mikaelsson L, Jacobsson G, Andersson R. *Pneumocystis* pneumonia—a retrospective study 1991–2001 in Gothenburg, Sweden. *J Infect* 2006; **53**: 260–5.
- 58 Monnet X, Vidal-Petiot E, Osman D et al. Care management and outcome of severe *Pneumocystis* pneumonia in patients with and without HIV infection. *Crit Care* 2008; **12**: R28.
- 59 Nüesch R, Bellini C, Zimmerli W. *Pneumocystis carinii* pneumonia in human immunodeficiency virus (HIV)-positive and HIV-negative immunocompromised patients. *Clin Infect Dis* 1999; **29**: 1519–23.



- 60 Azoulay E, Lemiale V, Mokart D *et al.* Acute respiratory distress syndrome in patients with malignancies. *Intensive Care Med* 2014; **40**: 1106–14.
- 61 Chaoui D, Legrand O, Roche N *et al.* Incidence and prognostic value of respiratory events in acute leukemia. *Leukemia* 2004; **18**: 670–5.
- 62 Gruson D, Vargas F, Hilbert G *et al.* Predictive factors of intensive care unit admission in patients with haematological malignancies and pneumonia. *Intensive Care Med* 2004; **30**: 965–71.
- 63 Lengliné E, Raffoux E, Lemiale V *et al.* Intensive care unit management of patients with newly diagnosed acute myeloid leukemia with no organ failure. *Leuk Lymphoma* 2012; **53**: 1352–9.
- 64 Mokart D, Lambert J, Schnell D *et al.* Delayed intensive care unit admission is associated with increased mortality in patients with cancer with acute respiratory failure. *Leuk Lymphoma* 2013; **54**: 1724–9.
- 65 Hilbert G, Gruson D, Vargas F *et al.* Noninvasive ventilation in immunosuppressed patients with pulmonary infiltrates, fever, and acute respiratory failure. *N Engl J Med* 2001; **344**: 481–7.
- 66 Amado-Rodríguez L, Bernal T, López-Alonso I *et al.* Impact of initial ventilatory strategy in hematological patients with acute respiratory failure: a systematic review and meta-analysis. *Crit Care Med* 2016 Feb 23 [Epub ahead of print].
- 67 Lemiale V, Resche-Rigon M, Mokart D *et al.* Acute respiratory failure in patients with hematological malignancies: outcomes according to initial ventilation strategy. A groupe de recherche respiratoire en réanimation onco-hématologique (Grrr-OH) study. *Ann Intensive Care* 2015; **5**: 28.
- 68 Lemiale V, Mokart D, Resche-Rigon M *et al.* Effect of noninvasive ventilation vs oxygen therapy on mortality among immunocompromised patients with acute respiratory failure: a randomized clinical trial. *JAMA* 2015; **314**: 1711–9.
- 69 Adda M, Coquet I, Darmon M *et al.* Predictors of noninvasive ventilation failure in patients with hematologic malignancy and acute respiratory failure. *Crit Care Med* 2008; **36**: 2766–72.
- 70 Depuydt PO, Benoit DD, Vandewoude KH *et al.* Outcome in noninvasively and invasively ventilated hematologic patients with acute respiratory failure. *Chest* 2004; **126**: 1299–306.
- 71 Molina R, Bernal T, Borges M *et al.* Ventilatory support in critically ill hematology patients with respiratory failure. *Crit Care* 2012; **16**: R133.
- 72 Soares M, Salluh JJ, Azoulay E. Noninvasive ventilation in patients with malignancies and hypoxemic acute respiratory failure: a still pending question. *J Crit Care* 2010; **25**: 37–8.
- 73 Ewald H, Raatz H, Boscacci R *et al.* Adjunctive corticosteroids for *Pneumocystis jirovecii* pneumonia in patients with HIV infection. *Cochrane Database Syst Rev* 2015; **4**: CD006150.
- 74 Limper AH, Knox KS, Sarosi GA *et al.* An official American Thoracic Society statement: treatment of fungal infections in adult pulmonary and critical care patients. *Am J Respir Crit Care Med* 2011; **183**: 96–128.
- 75 Roembke F, Heinzow HS, Gosseling T *et al.* Clinical outcome and predictors of survival in patients with *Pneumocystis jirovecii* pneumonia—results of a tertiary referral centre. *Clin Respir J* 2014; **8**: 86–92.
- 76 Annaloro C, Della Volpe A, Usardi P *et al.* Caspofungin treatment of *Pneumocystis* pneumonia during conditioning for bone marrow transplantation. *Eur J Clin Microbiol Infect Dis* 2006; **25**: 52–4.
- 77 Hof H, Schnülle P. *Pneumocystis jirovecii* pneumonia in a patient with Wegener's granulomatosis treated efficiently with caspofungin. *Mycoses* 2008; **51** Suppl 1: 65–7.
- 78 Burke BA, Good RA. *Pneumocystis carinii* infection. *Medicine (Baltimore)* 1973; **52**: 23–51.
- 79 Delclaux C, Zahar JR, Amraoui G *et al.* Corticosteroids as adjunctive therapy for severe *Pneumocystis carinii* pneumonia in non-human immunodeficiency virus-infected patients: retrospective study of 31 patients. *Clin Infect Dis* 1999; **29**: 670–2.
- 80 Overgaard UM, Helweg-Larsen J. *Pneumocystis jirovecii* pneumonia (PCP) in HIV-1-negative patients: a retrospective study 2002–2004. *Scand J Infect Dis* 2007; **39**: 589–95.
- 81 Pareja JG, Garland R, Koziel H. Use of adjunctive corticosteroids in severe adult non-HIV *Pneumocystis carinii* pneumonia. *Chest* 1998; **113**: 1215–24.
- 82 Zahar JR, Robin M, Azoulay E *et al.* *Pneumocystis carinii* pneumonia in critically ill patients with malignancy: a descriptive study. *Clin Infect Dis* 2002; **35**: 929–34.
